# Supplementary material for: Diagnosis-Specific Work Disability before and after Lumbar Spine Decompression Surgery—A Register Study from Sweden
Source: MDPI journal article supplement (doi:10.3390/ijerph18178937), 2021-08-25
Supplement: s1 [file s1]

**Supplementary Table 1.** Long-term sickness absence (LTSA) (> 90 net sickness absence days) and disability pension (DP) due to certain diagnoses (ICD-10 codes)<sup>1</sup> in the three years following cohort entry date (t+1, t+2, t+3), among Swedish residents, aged 19-60 years, with low back pain (LBP) treated by lumbar spine decompression surgery (LSDS) during 2008-10, with LBP without LSDS and persons with no diagnosed LBP

| LSDS<br>n (%)<br>10 800 (100%)                                              |                   | LBP no LSDS<br>n (%)<br>109 179 (100%) |                    | No diagnosed LBP<br>n (%)<br>472 191 (100%) |                    |
|-----------------------------------------------------------------------------|-------------------|----------------------------------------|--------------------|---------------------------------------------|--------------------|
| LTSA                                                                        | DP                | LTSA                                   | DP                 | LTSA                                        | DP                 |
| <b>Neoplasm (C00-D48)*</b>                                                  |                   |                                        |                    |                                             |                    |
| 60 (0.56)                                                                   | 6 (0.06)          | 745 (0.68)                             | 144 (0.13)         | 3254 (0.70)                                 | 277 (0.06)         |
| <b>Mental disorders (F00-F99)*</b>                                          |                   |                                        |                    |                                             |                    |
| 321 (2.97)                                                                  | 117 (1.08)        | 4714 (4.32)                            | 1708 (1.56)        | 13140 (2.78)                                | 3498 (0.74)        |
| <b>Diseases of the nervous system (G00-G99)*</b>                            |                   |                                        |                    |                                             |                    |
| 57 (0.53)                                                                   | 40 (0.37)         | 570 (0.52)                             | 307 (0.28)         | 1192 (0.25)                                 | 519 (0.11)         |
| <b>Cardiovascular diseases (I00-I99)*</b>                                   |                   |                                        |                    |                                             |                    |
| 49 (0.45)                                                                   | 15 (0.14)         | 607 (0.56)                             | 212 (0.19)         | 2216 (0.47)                                 | 609 (0.13)         |
| <b>Musculoskeletal diseases (M00-M99)*</b>                                  |                   |                                        |                    |                                             |                    |
| 1773 (16.42)                                                                | 402 (3.72)        | 10 633 (9.74)                          | 2961 (2.71)        | 8399 (1.78)                                 | 1073 (0.23)        |
| <b>Symptoms, signs and abnormal clinical laboratory findings (R00-R99)*</b> |                   |                                        |                    |                                             |                    |
| 55 (0.51)                                                                   | 21 (0.19)         | 772 (0.71)                             | 224 (0.21)         | 1155 (0.24)                                 | 128 (0.03)         |
| <b>Injuries/poisoning (S00-T98)*</b>                                        |                   |                                        |                    |                                             |                    |
| 119 (1.10)                                                                  | 48 (0.44)         | 1424 (1.30)                            | 570 (0.52)         | 3722 (0.79)                                 | 579 (0.12)         |
| <b>Other diagnoses</b>                                                      |                   |                                        |                    |                                             |                    |
| 112 (1.04)                                                                  | 32 (0.30)         | 1777 (1.63)                            | 363 (0.33)         | 4395 (0.93)                                 | 715 (0.15)         |
| <b>Total</b>                                                                |                   |                                        |                    |                                             |                    |
| <b>2546 (23.57)</b>                                                         | <b>681 (6.31)</b> | <b>21 242 (19.46)</b>                  | <b>6489 (5.94)</b> | <b>37 473 (7.94)</b>                        | <b>7938 (1.68)</b> |

\*Significant between group differences tested by Chi2 at level of p <0.0001.

<sup>1</sup>International Statistical Classification of Diseases and Related Health Problems, 10th revision
